# Supplementary material for: Chromatography related performance of the Monitor for AeRosols and GAses in ambient air (MARGA): laboratory and field-based evaluation
Source: Copernicus journal article supplement (doi:10.5194/amt-10-3893-2017), 2017-10-24
Supplement: Supplementary file [file amt-10-3893-2017-supplement.pdf]

Supplement of Atmos. Meas. Tech., 10, 3893–3908, 2017  
<https://doi.org/10.5194/amt-10-3893-2017-supplement>  
© Author(s) 2017. This work is distributed under  
the Creative Commons Attribution 3.0 License.

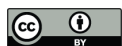

*Supplement of*

## **Chromatography related performance of the Monitor for AeRosols and Gases in ambient air (MARGA): laboratory and field-based evaluation**

**Xi Chen et al.**

*Correspondence to:* John T. Walker ([walker.johnt@epa.gov](mailto:walker.johnt@epa.gov))

The copyright of individual parts of the supplement might differ from the CC BY 3.0 License.

Table S1. Concentrations ( $\mu\text{g/L}$ ) of external liquid standards and certified accuracy check standard.

|           | $\text{Cl}^-$ | $\text{NO}_3^-$ | $\text{SO}_4^{2-}$ | $\text{Na}^+$ | $\text{NH}_4^+$ | $\text{K}^+$ | $\text{Mg}^{2+}$ | $\text{Ca}^{2+}$ |
|-----------|---------------|-----------------|--------------------|---------------|-----------------|--------------|------------------|------------------|
| Level 1   | 3.28          | 2.15            | 2.07               | 0.42          | 2.06            | 0.35         | 0.21             | 0.24             |
| Level 2   | 6.55          | 4.31            | 4.15               | 0.84          | 4.12            | 0.70         | 0.42             | 0.47             |
| Level 3   | 16.39         | 10.77           | 10.37              | 2.09          | 10.30           | 1.74         | 1.05             | 1.19             |
| Level 4   | 32.78         | 21.54           | 20.75              | 4.18          | 20.60           | 3.49         | 2.10             | 2.37             |
| Level 5   | 65.55         | 43.07           | 41.50              | 8.36          | 41.20           | 6.98         | 4.20             | 4.74             |
| Level 6   | 163.87        | 107.68          | 103.74             | 20.90         | 103.01          | 17.44        | 10.48            | 11.86            |
| Level 7   | 327.74        | 215.36          | 207.48             | 41.80         | 206.02          | 34.88        | 20.95            | 23.72            |
| Level 8   | 655.48        | 430.72          | 414.96             | 83.59         | 412.04          | 69.75        | 41.91            | 47.43            |
| Check std | 25.00         | 25.00           | 25.00              | 15.00         | 15.00           | 25.00        | 20.00            | 20.00            |

Table S2. Peak areas of internal standard LiBr as integrated by MARGA tool and Chromeleon over different external standard levels.

|         | MARGA tool           |                      | Chromeleon           |                      | Difference %    |                 | Average difference % |                 |
|---------|----------------------|----------------------|----------------------|----------------------|-----------------|-----------------|----------------------|-----------------|
|         | Br <sup>-</sup> area | Li <sup>+</sup> area | Br <sup>-</sup> area | Li <sup>+</sup> area | Br <sup>-</sup> | Li <sup>+</sup> | Br <sup>-</sup>      | Li <sup>+</sup> |
| level 1 | 207.86               | 437.51               | 174.78               | 374.34               | 19              | 17              | 18                   | 17              |
|         | 214.16               | 444.26               | 183.06               | 382.26               | 17              | 16              |                      |                 |
|         | 209.94               | 449.25               | 178.38               | 379.98               | 18              | 18              |                      |                 |
| level 2 | 208.63               | 448.56               | 175.68               | 381.90               | 19              | 17              | 17                   | 16              |
|         | 207.29               | 446.07               | 177.42               | 381.18               | 17              | 17              |                      |                 |
|         | 207.36               | 439.45               | 179.16               | 388.08               | 16              | 13              |                      |                 |
| level 3 | 205.33               | 456.92               | 175.44               | 391.56               | 17              | 17              | 17                   | 16              |
|         | 206.85               | 439.84               | 176.10               | 378.06               | 17              | 16              |                      |                 |
|         | 207.14               | 450.44               | 174.90               | 387.60               | 18              | 16              |                      |                 |
| level 4 | 209.18               | 443.28               | 178.68               | 381.96               | 17              | 16              | 17                   | 17              |
|         | 206.42               | 450.00               | 177.00               | 382.26               | 17              | 18              |                      |                 |
|         | 206.28               | 465.22               | 176.82               | 397.14               | 17              | 17              |                      |                 |
| level 5 | 207.80               | 452.03               | 177.72               | 388.74               | 17              | 16              | 17                   | 16              |
|         | 208.56               | 444.99               | 178.86               | 383.70               | 17              | 16              |                      |                 |
|         | 204.07               | 442.72               | 174.30               | 383.28               | 17              | 16              |                      |                 |
| level 6 | 207.06               | 447.54               | 177.42               | 386.40               | 17              | 16              | 17                   | 15              |
|         | 207.88               | 440.05               | 178.08               | 384.30               | 17              | 15              |                      |                 |
|         | 206.26               | 444.83               | 177.06               | 388.56               | 16              | 14              |                      |                 |
| level 7 | 212.62               | 432.12               | 181.14               | 381.30               | 17              | 13              | 17                   | 13              |
|         | 205.94               | 442.50               | 176.64               | 389.88               | 17              | 13              |                      |                 |
|         | 207.03               | 448.96               | 177.78               | 398.40               | 16              | 13              |                      |                 |
| level 8 | 207.31               | 428.00               | 177.96               | 388.92               | 16              | 10              | 16                   | 11              |
|         | 208.51               | 426.98               | 182.04               | 383.40               | 15              | 11              |                      |                 |
|         | 206.86               | 435.68               | 177.18               | 390.36               | 17              | 12              |                      |                 |

Table S3. Fraction of data points invalidated due to mis-identification and mis-integration by MARGA tool for sampling at Duke Forest during fall 2014.

|           | $\text{NO}_3^-$ | $\text{SO}_4^{2-}$ | $\text{NH}_4^+$ | $\text{HNO}_3$ | $\text{SO}_2$ | $\text{NH}_3$ |
|-----------|-----------------|--------------------|-----------------|----------------|---------------|---------------|
| % Invalid | 3.5             | 0.2                | 0.5             | 6.2            | 0.1           | 0.8           |
| Total #   | 1271            | 1271               | 1300            | 1305           | 1305          | 1302          |

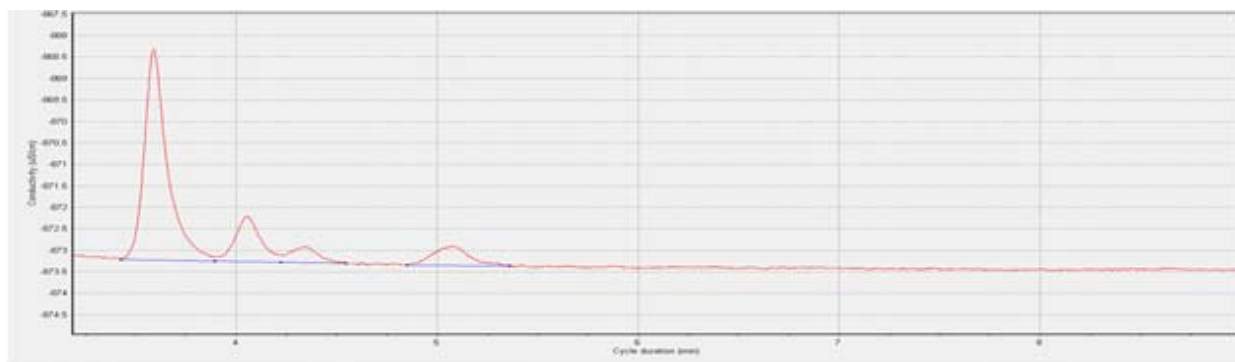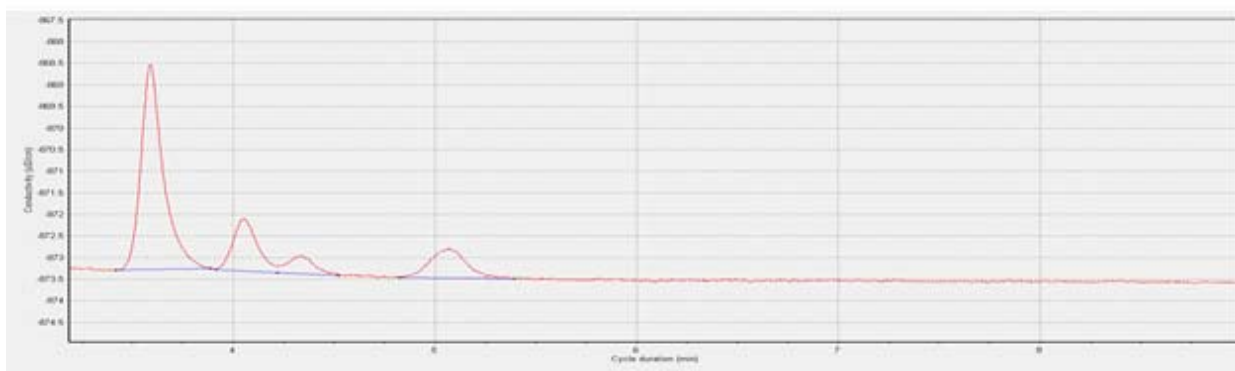

Figure S1. Chromatograms integrated by MARGA tool; top figure shows integration option of “drop perpendicular” applied to  $\text{Li}^+$ ,  $\text{Na}^+$  and  $\text{NH}_4^+$  peaks; while the bottom figure shows option “valley to valley” applied to a parallel chromatogram (note MARGA tool only shows a dot representing peak start or end point; from left to right, the peaks shown should be  $\text{Li}^+$ ,  $\text{Na}^+$ ,  $\text{NH}_4^+$  and  $\text{K}^+$ ).

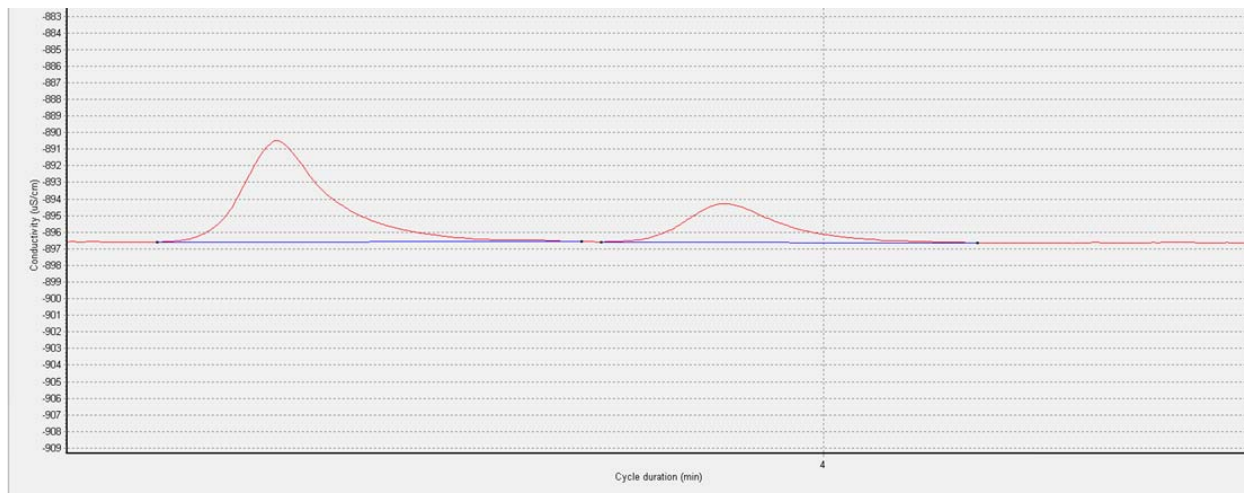

Figure S2. Chromatogram integrated by MARGA tool showing  $\text{NH}_4^+$  peak mis-identified as  $\text{Na}^+$  (from left to right, the peaks shown should be  $\text{Li}^+$  and  $\text{NH}_4^+$ ).

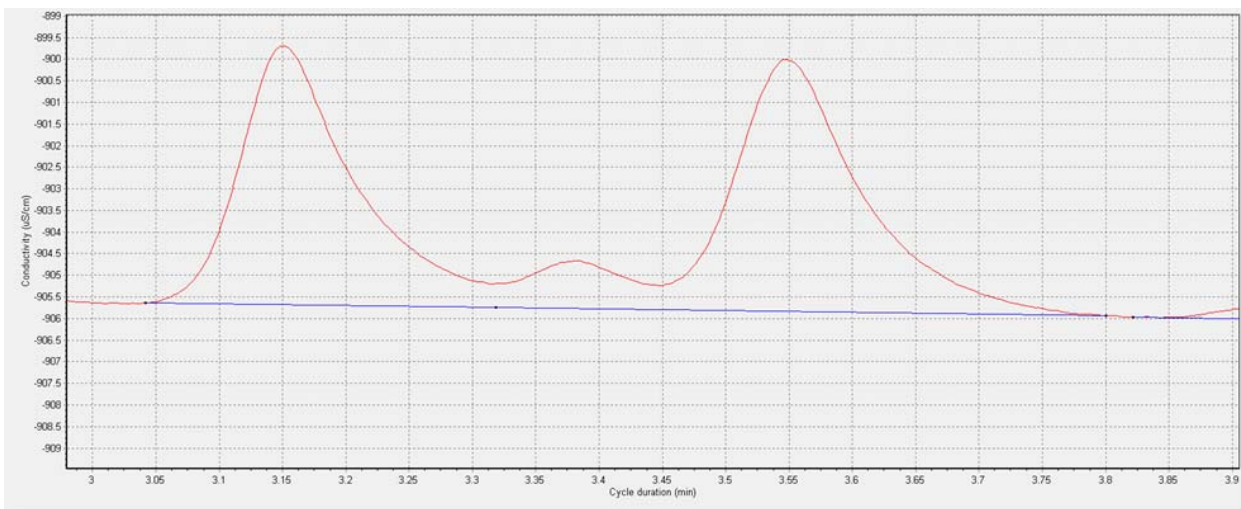

Figure S3. Chromatogram integrated by MARGA tool showing mis-identification of  $\text{NH}_4^+$  and  $\text{Na}^+$  peaks together as a single  $\text{NH}_4^+$  peak (note MARGA tool only shows a dot representing peak start or end point; from left to right, the peaks shown should be  $\text{Li}^+$ ,  $\text{Na}^+$  and  $\text{NH}_4^+$ ).

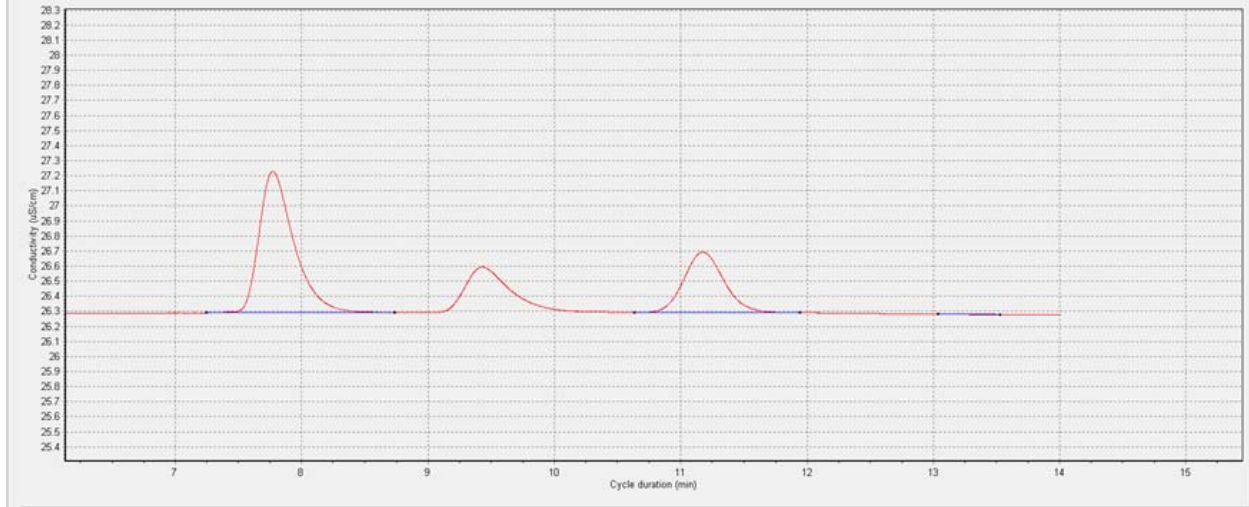

Figure S4. Chromatogram integrated by MARGA tool showing  $\text{NO}_3^-$  peak not integrated or identified (from left to right, the peaks shown should be  $\text{Br}^-$ ,  $\text{NO}_3^-$  and  $\text{SO}_4^{2-}$ ).



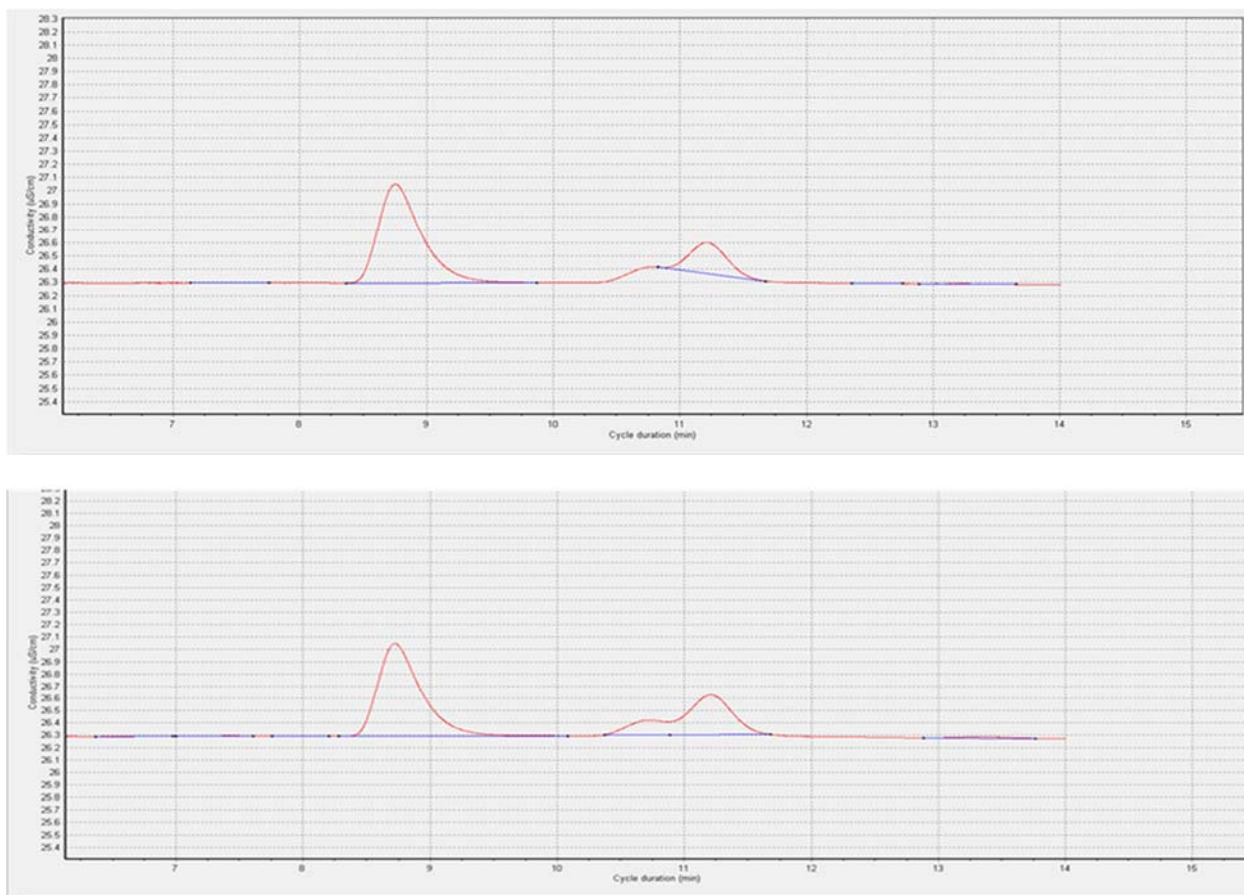

Figure S5. Chromatograms integrated by MARGA tool. Top figure shows “valley to valley” integration of  $\text{SO}_4^{2-}$  peak while  $\text{NO}_3^-$  peak was not identified and integrated for a sample by sample box 1. Bottom figure shows integration option “drop perpendicular” applied to a parallel sample of the same hour by sample box 2 in which both  $\text{SO}_4^{2-}$  and  $\text{NO}_3^-$  peaks were identified and integrated (from left to right, the peaks shown should be  $\text{Br}^-$ ,  $\text{NO}_3^-$  and  $\text{SO}_4^{2-}$ ).

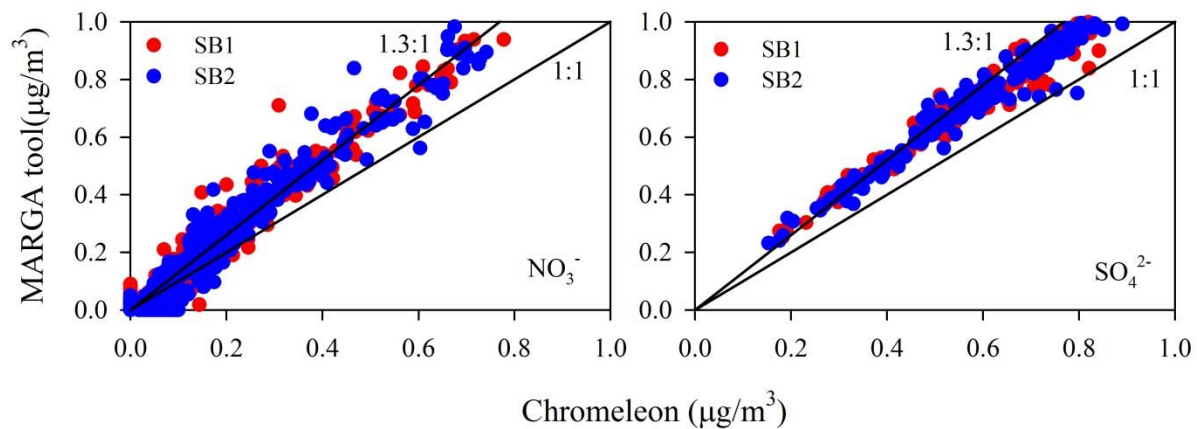

Figure S6. Comparison of  $\text{NO}_3^-$  and  $\text{SO}_4^{2-}$  during fall 2014 field intensive at Duke Forest as reported by MARGA tool and Chromeleon for concentration regions lower than  $1.0\mu\text{g}/\text{m}^3$ . Data mis-integrated by the MARGA tool were excluded from this comparison (SB: sample box, lines 1.3:1 and 1:1 are shown as guide).

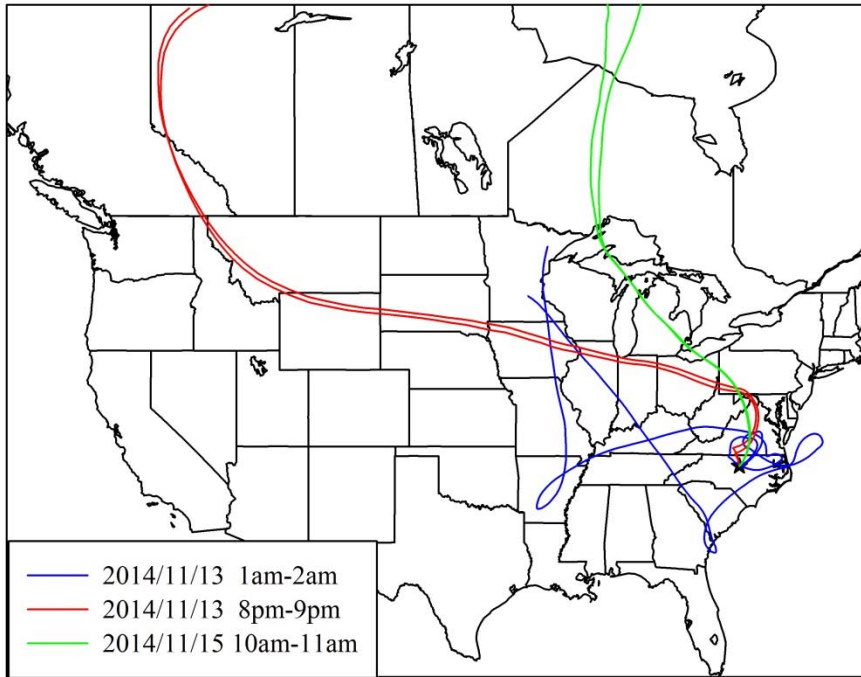

Figure S7. Corresponding back trajectories (arrival at 500AGL, backwards for 168hrs) of 3 spike peaks ( $\pm 1$ hr) of observed SO<sub>2</sub> concentrations.

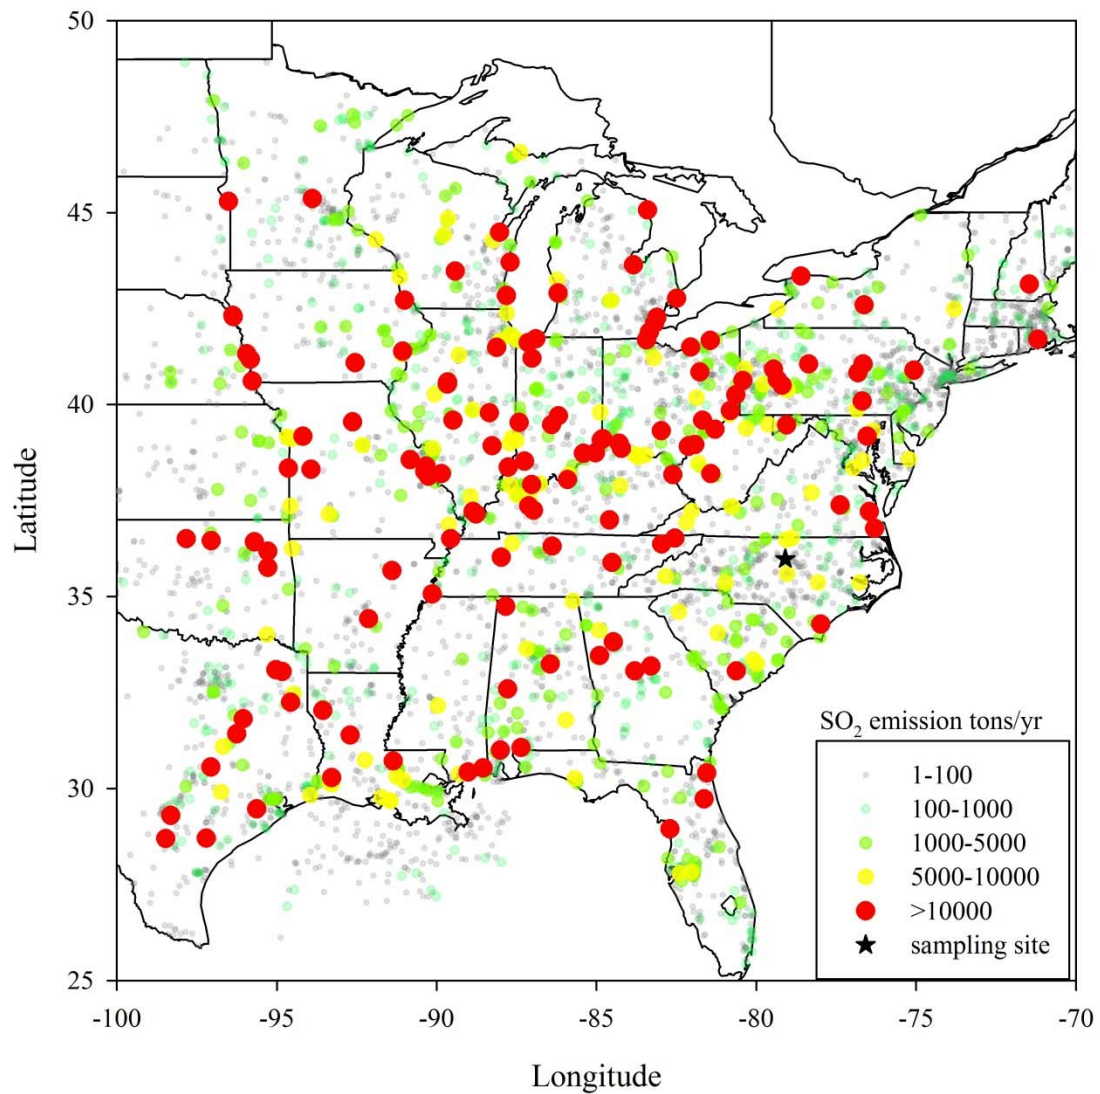

Figure S8. SO<sub>2</sub> Emission inventory map covering mid and eastern US from point sources 2011.
